# Supplementary material for: Worldwide Disparity in the Relation Between CKD Prevalence and Kidney Failure Risk
Source: PubMed Central journal article supplement — Kidney Int Rep. 2020 Oct 8;5(12):2284–91. doi: 10.1016/j.ekir.2020.09.040 (PMC7710841; doi:10.1016/j.ekir.2020.09.040), 2020-10-08

## *Supplementary material*

Supplementary Table S1. Age-adjusted CKD prevalence and KRT incidence, by region (61 countries).

Supplementary Table S2. Age-adjusted CKD prevalence and KRT incidence, by gender and by region (41 countries).

Supplementary Table S3. Age-adjusted CKD prevalence, all-cause and kidney disease-related mortality rates (59 countries).

Supplemental Table S4. Age-adjusted CKD prevalence and adjusted all-cause mortality, by gender and region (59 countries).

Supplementary Table S5. Linear regression estimates for the association between age-adjusted CKD prevalence and A) KRT incidence, or B) age-adjusted mortality rates, by gender and by region.

Supplementary Figure 1. Incidence of KRT according to crude CKD prevalence, by region.

Supplementary Figure 2: Age-standardized CKD-related mortality according to age-standardized CKD prevalence, by region.

**Supplementary Table S1. Age-adjusted CKD prevalence and KRT incidence, by region (61 countries).**

| <b>Group</b>                      | <b>Region</b>              | <b>Country or sub-region</b> | <b>Age-adjusted CKD prevalence (%)</b> | <b>KRT incidence (pmp)</b> |
|-----------------------------------|----------------------------|------------------------------|----------------------------------------|----------------------------|
| <b>High Income</b>                |                            |                              |                                        |                            |
|                                   | Australasia                | Australia                    | 7.8                                    | 117                        |
|                                   | Australasia                | New Zealand                  | 7.7                                    | 119                        |
|                                   | High-income Asia-Pacific   | Japan                        | 9.5                                    | 296                        |
|                                   | High-income Asia-Pacific   | Rep. of Korea                | 7.7                                    | 311                        |
|                                   | High-income Asia-Pacific   | Singapore                    | 10.4                                   | 333                        |
|                                   | High-income North America  | Canada                       | 6.6                                    | 200                        |
|                                   | High-income North America  | United States                | 9                                      | 378                        |
|                                   | Southern Latin America     | Argentina                    | 8.2                                    | 165                        |
|                                   | Southern Latin America     | Chile                        | 7.7                                    | 169                        |
|                                   | Southern Latin America     | Uruguay                      | 7.7                                    | 166                        |
|                                   | Western Europe             | Austria                      | 6.1                                    | 133                        |
|                                   | Western Europe             | Belgium, Dutch sp.           | 6.2                                    | 187                        |
|                                   | Western Europe             | Belgium, French sp.          | 6.2                                    | 188                        |
|                                   | Western Europe             | Denmark                      | 6.3                                    | 128                        |
|                                   | Western Europe             | Finland                      | 6.3                                    | 102                        |
|                                   | Western Europe             | France                       | 5.8                                    | 165                        |
|                                   | Western Europe             | Greece                       | 5.8                                    | 251                        |
|                                   | Western Europe             | Iceland                      | 5.6                                    | 89                         |
|                                   | Western Europe             | Israel                       | 6.7                                    | 191                        |
|                                   | Western Europe             | Italy                        | 5.6                                    | 145                        |
|                                   | Western Europe             | Netherlands                  | 6.7                                    | 117                        |
|                                   | Western Europe             | Norway                       | 6.3                                    | 106                        |
|                                   | Western Europe             | Portugal                     | 6.3                                    | 236                        |
|                                   | Western Europe             | Scotland                     | 5.9                                    | 106                        |
|                                   | Western Europe             | Spain                        | 5.5                                    | 142                        |
|                                   | Western Europe             | Sweden                       | 7.4                                    | 121                        |
|                                   | Western Europe             | Switzerland                  | 6.3                                    | 101                        |
|                                   | Western Europe             | United Kingdom               | 5.6                                    | 120                        |
| <b>Central and Eastern Europe</b> |                            |                              |                                        |                            |
|                                   | Central and Eastern Europe | Albania                      | 7.6                                    | 81                         |
|                                   | Central and Eastern Europe | Belarus                      | 11.9                                   | 51                         |
|                                   | Central and Eastern Europe | Bosnia and Herzegovina       | 8.7                                    | 113                        |
|                                   | Central and Eastern Europe | Bulgaria                     | 8.4                                    | 161                        |
|                                   | Central and Eastern Europe | Estonia                      | 13.1                                   | 85                         |
|                                   | Central and Eastern Europe | Hungary                      | 8.7                                    | 222                        |
|                                   | Central and Eastern Europe | Latvia                       | 12.7                                   | 88                         |
|                                   | Central and Eastern Europe | Lithuania                    | 12.1                                   | 107                        |
|                                   | Central and Eastern Europe | Macedonia                    | 8.7                                    | 164                        |
|                                   | Central and Eastern Europe | Poland                       | 7.8                                    | 149                        |
|                                   | Central and Eastern Europe | Romania                      | 7.6                                    | 175                        |
|                                   | Central and Eastern Europe | Russia                       | 13.7                                   | 58                         |
|                                   | Central and Eastern Europe | Serbia                       | 8.9                                    | 92                         |
|                                   | Central and Eastern Europe | Slovakia                     | 8.2                                    | 128                        |

|                                |                  |      |     |
|--------------------------------|------------------|------|-----|
| Central and Eastern Europe     | Ukraine          | 12.3 | 32  |
| <b>Other</b>                   |                  |      |     |
| Latin America                  | Brazil           | 7.6  | 194 |
| Latin America                  | Colombia         | 10   | 80  |
| Latin America                  | Guatemala        | 11.3 | 197 |
| Latin America                  | Jalisco (Mexico) | 13.1 | 355 |
| Latin America                  | Peru             | 7.4  | 71  |
| North Africa and Middle East   | Iran             | 11.3 | 81  |
| North Africa and Middle East   | Jordan           | 10.9 | 60  |
| North Africa and Middle East   | Kuwait           | 10.4 | 141 |
| North Africa and Middle East   | Qatar            | 10.5 | 123 |
| North Africa and Middle East   | Saudi Arabia     | 10.4 | 145 |
| North Africa and Middle East   | Turkey           | 10.9 | 140 |
| South, East and Southeast Asia | Bangladesh       | 8.4  | 51  |
| South, East and Southeast Asia | Indonesia        | 11.4 | 135 |
| South, East and Southeast Asia | Malaysia         | 11.8 | 259 |
| South, East and Southeast Asia | Philippines      | 11.4 | 172 |
| South, East and Southeast Asia | Taiwan           | 8.8  | 493 |
| South, East and Southeast Asia | Thailand         | 10.7 | 346 |
| Southern Sub-Saharan Africa    | South Africa     | 12.2 | 22  |

**Supplementary Table S2. Age-adjusted CKD prevalence and KRT incidence, by gender and by region (41 countries).**

| <b>Group</b>                      | <b>Region</b>              | <b>Country</b>      | <b>Men<br/>Age-adjusted<br/>CKD prevalence<br/>(%)</b> | <b>Men<br/>KRT incidence<br/>(pmp)</b> | <b>Women<br/>Age-adjusted<br/>CKD prevalence<br/>(%)</b> | <b>Women<br/>KRT incidence<br/>(pmp)</b> |
|-----------------------------------|----------------------------|---------------------|--------------------------------------------------------|----------------------------------------|----------------------------------------------------------|------------------------------------------|
| <b>High Income</b>                |                            |                     |                                                        |                                        |                                                          |                                          |
|                                   | High-income Asia-Pacific   | Japan               | 8.5                                                    | 296                                    | 10.4                                                     | 296                                      |
|                                   | High-income Asia-Pacific   | Singapore           | 9.1                                                    | 333                                    | 11.7                                                     | 333                                      |
|                                   | High-income North America  | Canada              | 5.7                                                    | 200                                    | 7.3                                                      | 200                                      |
|                                   | High-income North America  | United States       | 8                                                      | 378                                    | 9.8                                                      | 378                                      |
|                                   | Southern Latin America     | Argentina           | 7.1                                                    | 165                                    | 9.1                                                      | 165                                      |
|                                   | Southern Latin America     | Uruguay             | 6.6                                                    | 166                                    | 8.5                                                      | 166                                      |
|                                   | Western Europe             | Austria             | 5.3                                                    | 133                                    | 6.7                                                      | 133                                      |
|                                   | Western Europe             | Belgium, Dutch sp.  | 5.5                                                    | 187                                    | 6.8                                                      | 187                                      |
|                                   | Western Europe             | Belgium, French sp. | 5.5                                                    | 188                                    | 6.8                                                      | 188                                      |
|                                   | Western Europe             | Denmark             | 5.6                                                    | 128                                    | 6.9                                                      | 128                                      |
|                                   | Western Europe             | Finland             | 5.5                                                    | 102                                    | 6.9                                                      | 102                                      |
|                                   | Western Europe             | France              | 5.1                                                    | 165                                    | 6.4                                                      | 165                                      |
|                                   | Western Europe             | Greece              | 5.1                                                    | 251                                    | 6.4                                                      | 251                                      |
|                                   | Western Europe             | Iceland             | 4.8                                                    | 89                                     | 6.4                                                      | 89                                       |
|                                   | Western Europe             | Israel              | 6                                                      | 191                                    | 7.4                                                      | 191                                      |
|                                   | Western Europe             | Italy               | 5                                                      | 145                                    | 6                                                        | 145                                      |
|                                   | Western Europe             | Netherlands         | 6                                                      | 117                                    | 7.3                                                      | 117                                      |
|                                   | Western Europe             | Norway              | 5.3                                                    | 106                                    | 7.2                                                      | 106                                      |
|                                   | Western Europe             | Scotland            | 5.2                                                    | 106                                    | 6.5                                                      | 106                                      |
|                                   | Western Europe             | Spain               | 4.8                                                    | 142                                    | 6.1                                                      | 142                                      |
|                                   | Western Europe             | Sweden              | 7.6                                                    | 121                                    | 7.1                                                      | 121                                      |
|                                   | Western Europe             | Switzerland         | 5.4                                                    | 101                                    | 7                                                        | 101                                      |
|                                   | Western Europe             | United Kingdom      | 4.8                                                    | 120                                    | 6.4                                                      | 120                                      |
| <b>Central and Eastern Europe</b> |                            |                     |                                                        |                                        |                                                          |                                          |
|                                   | Central and Eastern Europe | Albania             | 6.2                                                    | 81                                     | 8.9                                                      | 81                                       |

|                            |           |      |     |      |     |
|----------------------------|-----------|------|-----|------|-----|
| Central and Eastern Europe | Belarus   | 10.3 | 51  | 12.9 | 51  |
| Central and Eastern Europe | Bulgaria  | 6.9  | 161 | 9.7  | 161 |
| Central and Eastern Europe | Estonia   | 11.4 | 85  | 14.2 | 85  |
| Central and Eastern Europe | Hungary   | 7    | 222 | 10.1 | 222 |
| Central and Eastern Europe | Latvia    | 11   | 88  | 13.9 | 88  |
| Central and Eastern Europe | Lithuania | 10.5 | 107 | 13.2 | 107 |
| Central and Eastern Europe | Macedonia | 7.2  | 164 | 10.2 | 164 |
| Central and Eastern Europe | Romania   | 6    | 175 | 9    | 175 |
| Central and Eastern Europe | Russia    | 11.7 | 58  | 15   | 58  |
| Central and Eastern Europe | Serbia    | 7.1  | 92  | 10.4 | 92  |
| Central and Eastern Europe | Slovakia  | 6.6  | 128 | 9.5  | 128 |
| Central and Eastern Europe | Ukraine   | 10.2 | 32  | 13.7 | 32  |

---

**Other**

|                                 |           |      |     |      |     |
|---------------------------------|-----------|------|-----|------|-----|
| Latin America                   | Peru      | 6.9  | 71  | 7.9  | 71  |
| North Africa and Middle East    | Jordan    | 9    | 60  | 12.9 | 60  |
| South, East, and Southeast Asia | Indonesia | 10.9 | 135 | 11.9 | 135 |
| South, East, and Southeast Asia | Malaysia  | 11   | 259 | 12.5 | 259 |
| South, East, and Southeast Asia | Taiwan    | 7.7  | 493 | 9.8  | 493 |

---

**Supplementary Table S3. Age-adjusted CKD prevalence, all-cause and kidney disease-related mortality rates (59 countries).**

| <b>Group</b>                      | <b>Country</b>         | <b>Adjusted CKD prevalence (%)</b> | <b>Adjusted All-cause mortality (per 100 000 inhabitants)</b> | <b>Adjusted CKD mortality (per 100 000 inhabitants)</b> |
|-----------------------------------|------------------------|------------------------------------|---------------------------------------------------------------|---------------------------------------------------------|
| <b>High Income</b>                |                        |                                    |                                                               |                                                         |
|                                   | Australia              | 7.8                                | 335.6                                                         | 9.6                                                     |
|                                   | New Zealand            | 7.7                                | 357.3                                                         | 2.5                                                     |
|                                   | Japan                  | 9.5                                | 299.0                                                         | 3.7                                                     |
|                                   | Rep. of Korea          | 7.7                                | 341.2                                                         | 8.9                                                     |
|                                   | Singapore              | 10.4                               | 337.9                                                         | 33.1                                                    |
|                                   | Canada                 | 6.6                                | 340.6                                                         | 5.8                                                     |
|                                   | United States          | 9                                  | 492.7                                                         | 3.1                                                     |
|                                   | Argentina              | 8.2                                | 555.4                                                         | 20.8                                                    |
|                                   | Chile                  | 7.7                                | 455.9                                                         | 18.0                                                    |
|                                   | Uruguay                | 7.7                                | 537.7                                                         | 13.3                                                    |
|                                   | Austria                | 6.1                                | 374.2                                                         | 6.4                                                     |
|                                   | Belgium                | 6.2                                | 398.5                                                         | 6.3                                                     |
|                                   | Denmark                | 6.3                                | 403.0                                                         | 42.4                                                    |
|                                   | Finland                | 6.3                                | 389.2                                                         | 19.3                                                    |
|                                   | France                 | 5.8                                | 338.3                                                         | 7.2                                                     |
|                                   | Greece                 | 5.8                                | 397.2                                                         | 5.1                                                     |
|                                   | Iceland                | 5.6                                | 356.8                                                         | 13.3                                                    |
|                                   | Israel                 | 6.7                                | 357.6                                                         | 15.1                                                    |
|                                   | Italy                  | 5.6                                | 343.2                                                         | 20.1                                                    |
|                                   | Netherlands            | 6.7                                | 386.0                                                         | 4.5                                                     |
|                                   | Norway                 | 6.3                                | 358.4                                                         | 3.2                                                     |
|                                   | Portugal               | 6.3                                | 385.5                                                         | 3.7                                                     |
|                                   | Spain                  | 5.5                                | 332.0                                                         | 28.8                                                    |
|                                   | Sweden                 | 7.4                                | 362.2                                                         | 30.9                                                    |
|                                   | Switzerland            | 6.3                                | 326.0                                                         | 3.7                                                     |
|                                   | United Kingdom         | 5.6                                | 390.2                                                         | 5.5                                                     |
| <b>Central and Eastern Europe</b> |                        |                                    |                                                               |                                                         |
|                                   | Albania                | 7.6                                | 609.2                                                         | 10.3                                                    |
|                                   | Belarus                | 11.9                               | 718.6                                                         | 17.0                                                    |
|                                   | Bosnia and Herzegovina | 8.7                                | 565.0                                                         | 4.6                                                     |
|                                   | Bulgaria               | 8.4                                | 679.1                                                         | 6.6                                                     |
|                                   | Estonia                | 13.1                               | 525.0                                                         | 14.8                                                    |
|                                   | Hungary                | 8.7                                | 632.1                                                         | 3.5                                                     |
|                                   | Latvia                 | 12.7                               | 647.2                                                         | 6.4                                                     |
|                                   | Lithuania              | 12.1                               | 649.3                                                         | 9.6                                                     |
|                                   | Macedonia              | 8.7                                | 666.0                                                         | 12.1                                                    |
|                                   | Poland                 | 7.8                                | 531.5                                                         | 13.0                                                    |
|                                   | Romania                | 7.6                                | 650.7                                                         | 4.1                                                     |
|                                   | Russia                 | 13.7                               | 797.8                                                         | 10.4                                                    |

|       |              |      |        |      |
|-------|--------------|------|--------|------|
|       | Serbia       | 8.9  | 629.8  | 10.9 |
|       | Slovakia     | 8.2  | 550.9  | 14.3 |
|       | Ukraine      | 12.3 | 789.3  | 4.0  |
| <hr/> |              |      |        |      |
|       | <b>Other</b> |      |        |      |
|       | Brazil       | 7.6  | 614.0  | 25.8 |
|       | Colombia     | 10   | 610.9  | 8.0  |
|       | Guatemala    | 11.3 | 678.8  | 14.5 |
|       | Mexico       | 12.8 | 563.3  | 3.8  |
|       | Peru         | 7.4  | 590.5  | 45.2 |
|       | Iran         | 11.3 | 654.8  | 16.0 |
|       | Jordan       | 10.9 | 707.0  | 9.2  |
|       | Kuwait       | 10.4 | 788.0  | 7.8  |
|       | Qatar        | 10.5 | 527.6  | 29.7 |
|       | Saudi Arabia | 10.4 | 699.5  | 5.4  |
|       | Turkey       | 10.9 | 586.3  | 3.5  |
|       | Bangladesh   | 8.4  | 720.2  | 4.1  |
|       | China        | 7.6  | 615.5  | 28.5 |
|       | Indonesia    | 11.4 | 999.8  | 22.1 |
|       | Malaysia     | 11.8 | 656.6  | 2.9  |
|       | Philippines  | 11.4 | 964.2  | 2.6  |
|       | Thailand     | 10.7 | 600.1  | 10.8 |
|       | South Africa | 12.2 | 1212.5 | 10.8 |

**Supplemental Table S4. Age-adjusted CKD prevalence and adjusted all-cause mortality, by gender and region (59 countries).**

| <b>Group</b>       | <b>Region</b>             | <b>Country</b> | <b>Men<br/>Age-adjusted<br/>CKD prevalence<br/>(%)</b> | <b>Men adjusted<br/>all-cause<br/>mortality<br/>(per 100 000<br/>inhabitants)</b> | <b>Women<br/>Age-adjusted<br/>CKD prevalence<br/>(%)</b> | <b>Women<br/>adjusted all-<br/>cause mortality<br/>(per 100 000<br/>inhabitants)</b> |
|--------------------|---------------------------|----------------|--------------------------------------------------------|-----------------------------------------------------------------------------------|----------------------------------------------------------|--------------------------------------------------------------------------------------|
| <b>High Income</b> |                           |                |                                                        |                                                                                   |                                                          |                                                                                      |
|                    | Australasia               | Australia      | 6.6                                                    | 398                                                                               | 8.9                                                      | 278                                                                                  |
|                    | Australasia               | New Zealand    | 6                                                      | 416                                                                               | 9.1                                                      | 304                                                                                  |
|                    | High-income Asia-Pacific  | Japan          | 8.5                                                    | 401                                                                               | 10.4                                                     | 217                                                                                  |
|                    | High-income Asia-Pacific  | Rep. of Korea  | 7                                                      | 464                                                                               | 8.4                                                      | 247                                                                                  |
|                    | High-income Asia-Pacific  | Singapore      | 9.1                                                    | 415                                                                               | 11.7                                                     | 272                                                                                  |
|                    | High-income North America | Canada         | 5.7                                                    | 402                                                                               | 7.3                                                      | 286                                                                                  |
|                    | High-income North America | United States  | 8                                                      | 592                                                                               | 9.8                                                      | 404                                                                                  |
|                    | Southern Latin America    | Argentina      | 7.1                                                    | 732                                                                               | 9.1                                                      | 425                                                                                  |
|                    | Southern Latin America    | Chile          | 6.7                                                    | 582                                                                               | 8.6                                                      | 356                                                                                  |
|                    | Southern Latin America    | Uruguay        | 6.6                                                    | 728                                                                               | 8.5                                                      | 400                                                                                  |
|                    | Western Europe            | Austria        | 5.3                                                    | 465                                                                               | 6.7                                                      | 298                                                                                  |
|                    | Western Europe            | Belgium        | 5.5                                                    | 493                                                                               | 6.8                                                      | 319                                                                                  |
|                    | Western Europe            | Denmark        | 5.6                                                    | 479                                                                               | 6.9                                                      | 337                                                                                  |
|                    | Western Europe            | Finland        | 5.5                                                    | 498                                                                               | 6.9                                                      | 297                                                                                  |
|                    | Western Europe            | France         | 5.1                                                    | 433                                                                               | 6.4                                                      | 256                                                                                  |
|                    | Western Europe            | Greece         | 5.1                                                    | 495                                                                               | 6.4                                                      | 310                                                                                  |
|                    | Western Europe            | Iceland        | 4.8                                                    | 410                                                                               | 6.4                                                      | 310                                                                                  |
|                    | Western Europe            | Israel         | 6                                                      | 434                                                                               | 7.4                                                      | 294                                                                                  |
|                    | Western Europe            | Italy          | 5                                                      | 424                                                                               | 6                                                        | 276                                                                                  |
|                    | Western Europe            | Netherlands    | 6                                                      | 452                                                                               | 7.3                                                      | 331                                                                                  |
|                    | Western Europe            | Norway         | 5.3                                                    | 426                                                                               | 7.2                                                      | 299                                                                                  |
|                    | Western Europe            | Portugal       | 5.6                                                    | 513                                                                               | 6.9                                                      | 285                                                                                  |
|                    | Western Europe            | Spain          | 4.8                                                    | 431                                                                               | 6.1                                                      | 249                                                                                  |
|                    | Western Europe            | Sweden         | 7.6                                                    | 427                                                                               | 7.1                                                      | 305                                                                                  |



|                                   |                        |      |      |      |     |
|-----------------------------------|------------------------|------|------|------|-----|
| Western Europe                    | Switzerland            | 5.4  | 395  | 7    | 267 |
| Western Europe                    | United Kingdom         | 4.8  | 455  | 6.4  | 333 |
| <b>Central and Eastern Europe</b> |                        |      |      |      |     |
| Central and Eastern Europe        | Albania                | 6.2  | 726  | 8.9  | 502 |
| Central and Eastern Europe        | Belarus                | 10.3 | 1065 | 12.9 | 489 |
| Central and Eastern Europe        | Bosnia and Herzegovina | 7    | 695  | 10.1 | 458 |
| Central and Eastern Europe        | Bulgaria               | 6.9  | 881  | 9.7  | 514 |
| Central and Eastern Europe        | Estonia                | 11.4 | 758  | 14.2 | 362 |
| Central and Eastern Europe        | Hungary                | 7    | 850  | 10.1 | 476 |
| Central and Eastern Europe        | Latvia                 | 11   | 928  | 13.9 | 454 |
| Central and Eastern Europe        | Lithuania              | 10.5 | 966  | 13.2 | 433 |
| Central and Eastern Europe        | Macedonia              | 7.2  | 795  | 10.2 | 557 |
| Central and Eastern Europe        | Poland                 | 6.3  | 726  | 9    | 381 |
| Central and Eastern Europe        | Romania                | 6    | 855  | 9    | 485 |
| Central and Eastern Europe        | Russia                 | 11.7 | 1152 | 15   | 549 |
| Central and Eastern Europe        | Serbia                 | 7.1  | 784  | 10.4 | 507 |
| Central and Eastern Europe        | Slovakia               | 6.6  | 740  | 9.5  | 408 |
| <b>Other</b>                      |                        |      |      |      |     |
| Latin America                     | Brazil                 | 6.9  | 786  | 8.2  | 469 |
| Latin America                     | Colombia               | 9.7  | 773  | 10.3 | 471 |
| Latin America                     | Guatemala              | 10.9 | 810  | 11.6 | 567 |
| Latin America                     | Mexico                 | 11.9 | 675  | 13.6 | 464 |
| Latin America                     | Peru                   | 6.9  | 707  | 7.9  | 488 |
| North Africa and Middle East      | Iran                   | 9.5  | 708  | 13.1 | 599 |
| North Africa and Middle East      | Jordan                 | 9    | 809  | 12.9 | 614 |
| North Africa and Middle East      | Kuwait                 | 8.8  | 834  | 12.7 | 722 |
| North Africa and Middle East      | Qatar                  | 9.5  | 564  | 13.6 | 455 |
| North Africa and Middle East      | Saudi Arabia           | 8.8  | 777  | 12.6 | 608 |
| North Africa and Middle East      | Turkey                 | 8.9  | 763  | 12.6 | 452 |
| South Asia                        | Bangladesh             | 7.6  | 804  | 9.3  | 636 |

|                                   |              |      |       |      |     |
|-----------------------------------|--------------|------|-------|------|-----|
| South, East and Southeast<br>Asia | China        | 6.6  | 697   | 8.6  | 539 |
| Southeast Asia                    | Indonesia    | 10.9 | 1 155 | 11.9 | 865 |
| Southeast Asia                    | Malaysia     | 11   | 761   | 12.5 | 552 |
| Southeast Asia                    | Philippines  | 10.5 | 1 180 | 12.1 | 779 |
| Southeast Asia                    | Thailand     | 9.9  | 765   | 11.4 | 455 |
| Southern Sub-Saharan Africa       | South Africa | 10.2 | 1 551 | 13.6 | 977 |

---

**Supplementary Table S5. Linear regression estimates for the association between age-adjusted CKD prevalence and A) KRT incidence, or B) age-adjusted mortality rates, by gender and by region.**

|                                              | Men     |                |         | Women   |                |         |
|----------------------------------------------|---------|----------------|---------|---------|----------------|---------|
|                                              | $\beta$ | R <sup>2</sup> | P value | $\beta$ | R <sup>2</sup> | P value |
| <b>A) KRT incidence</b>                      |         |                |         |         |                |         |
| High Income (N=23)                           | 4407.2  | 0.49           | <0.001  | 3873.8  | 0.56           | <0.001  |
| Central and Eastern Europe (N=13)            | -1641.7 | 0.43           | 0.01    | -1654.3 | 0.44           | 0.01    |
| Other (N=5)                                  | -893.5  | 0.01           | 0.88    | -1138.5 | 0.02           | 0.83    |
| <b>B) Age-adjusted mortality rates (log)</b> |         |                |         |         |                |         |
| High Income (N=26)                           | 2.5     | 0.03           | 0.39    | 0.9     | 0.01           | 0.69    |
| Central and Eastern Europe (N=14)            | 5.1     | 0.47           | 0.005   | 0.35    | 0.00           | 0.84    |
| Other (N=18)                                 | 4.4     | 0.23           | 0.25    | 3.5     | 0.08           | 0.25    |

A negative sign before the **beta** ( $\beta$ ) coefficient indicates that the relation between CKD prevalence and KRT incidence or age-adjusted mortality rate is negative.

*R-squared* (R<sup>2</sup>) represents the proportion of the *variance* for KRT incidence or age-adjusted mortality rate that is *explained* by CKD prevalence.

Supplementary Figure S1: Incidence of KRT according to crude CKD prevalence, by region.

Legend: KRT, kidney replacement therapy; pmp, per million population; CKD, chronic kidney disease.

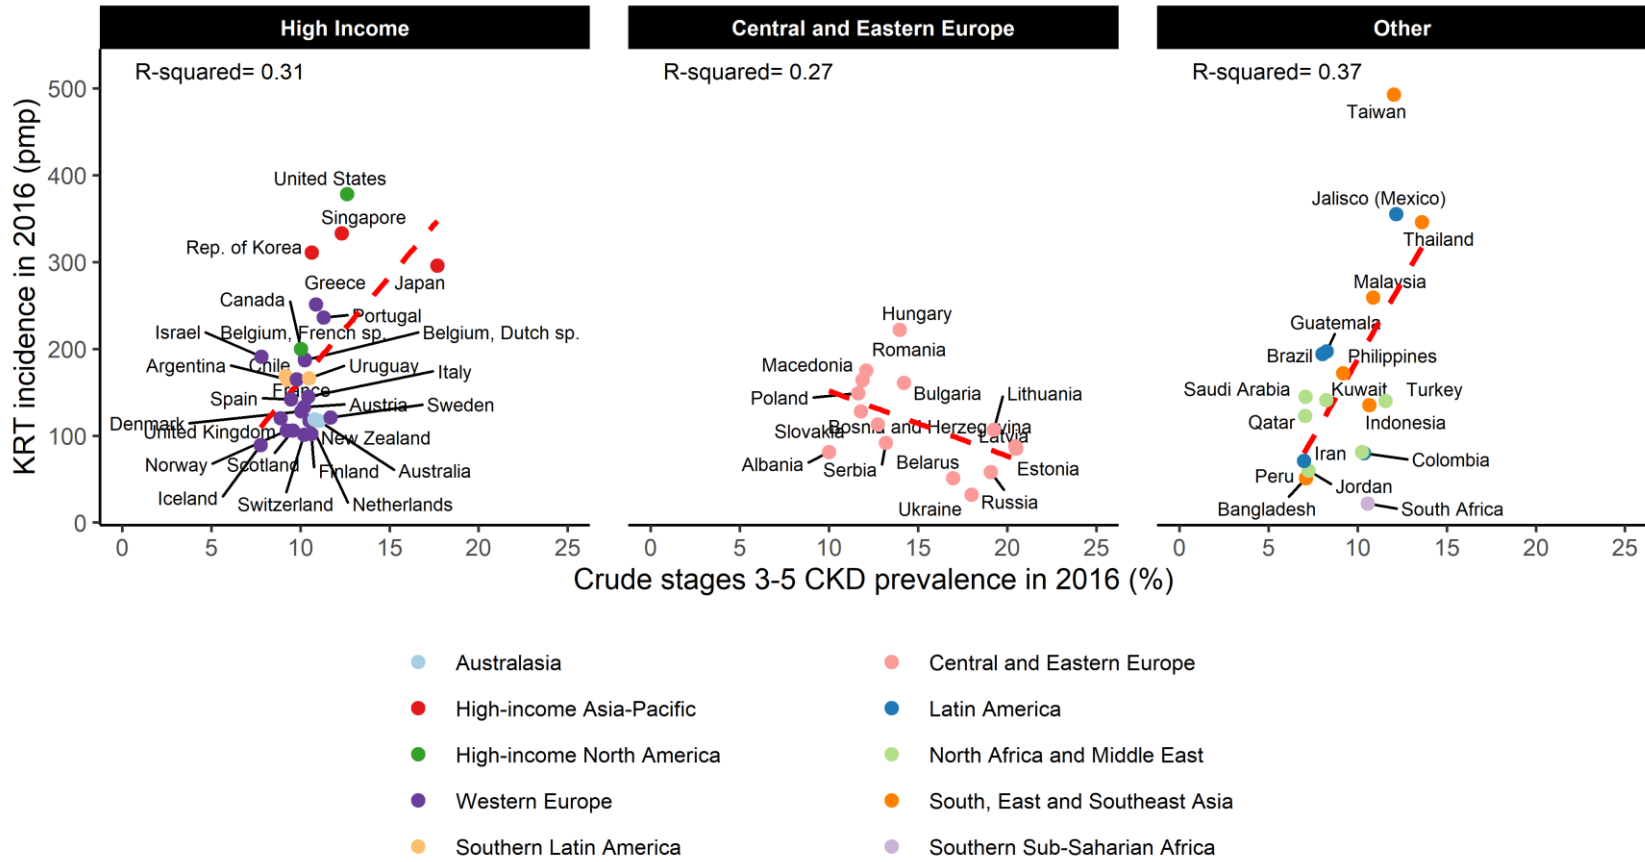

Supplementary Figure S2: Age-standardized CKD-related mortality according to age-standardized CKD prevalence, by region.

Legend: CKD, chronic kidney disease.

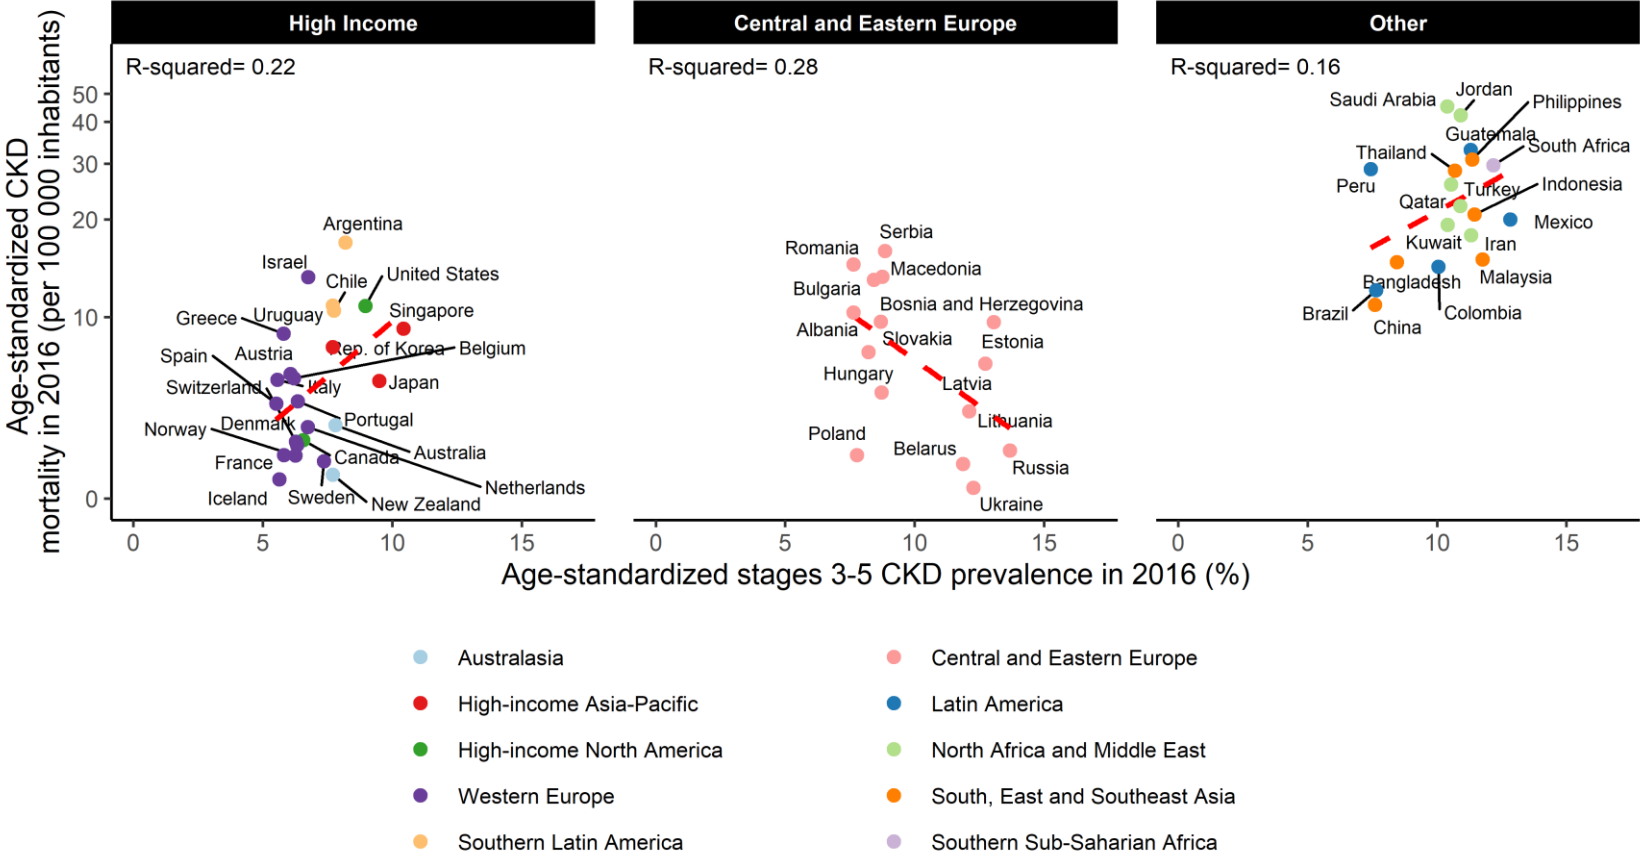

Supplement: mmc1.pdf [file mmc1.pdf]
